# Supplementary material for: High efficacy of third generation EGFR inhibitor AZD9291 in a leptomeningeal carcinomatosis model with EGFR-mutant lung cancer cells
Source: PubMed Central journal article supplement (PMC4826174; doi:10.18632/oncotarget.6758), 2015-12-24
Supplement: oncotarget-07-3847-s001.pdf [file oncotarget-07-3847-s001.pdf]

## High efficacy of third generation EGFR inhibitor AZD9291 in a leptomeningeal carcinomatosis model with *EGFR*-mutant lung cancer cells

### Supplementary Materials

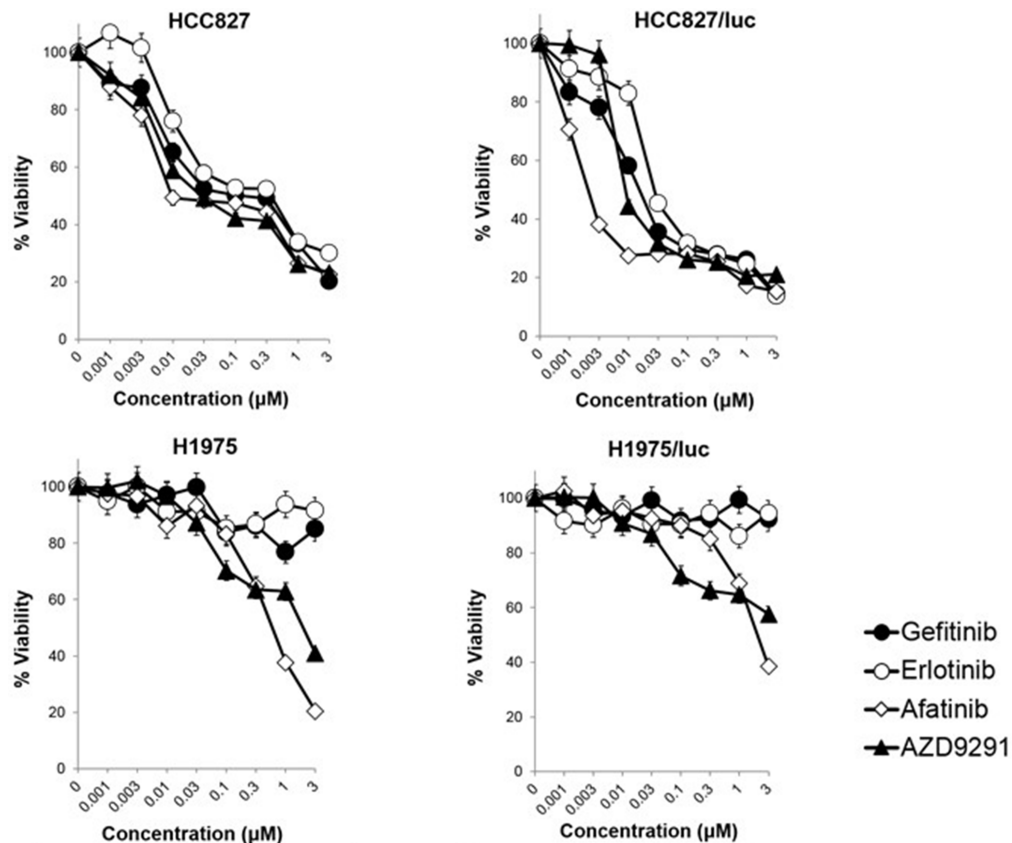

**Supplementary Figure S1: Sensitivity of HCC827/luc and H1975/luc cells to EGFR-TKIs *in vitro*.** HCC827, HCC827/luc, H1975, and H1975/luc cells ( $2 \times 10^3$  cells per well) were incubated with various concentrations of erlotinib, gefitinib, AZD9291, and afatinib for 72 hours. Cell growth was determined by the MTT assay. Bars represent SD.

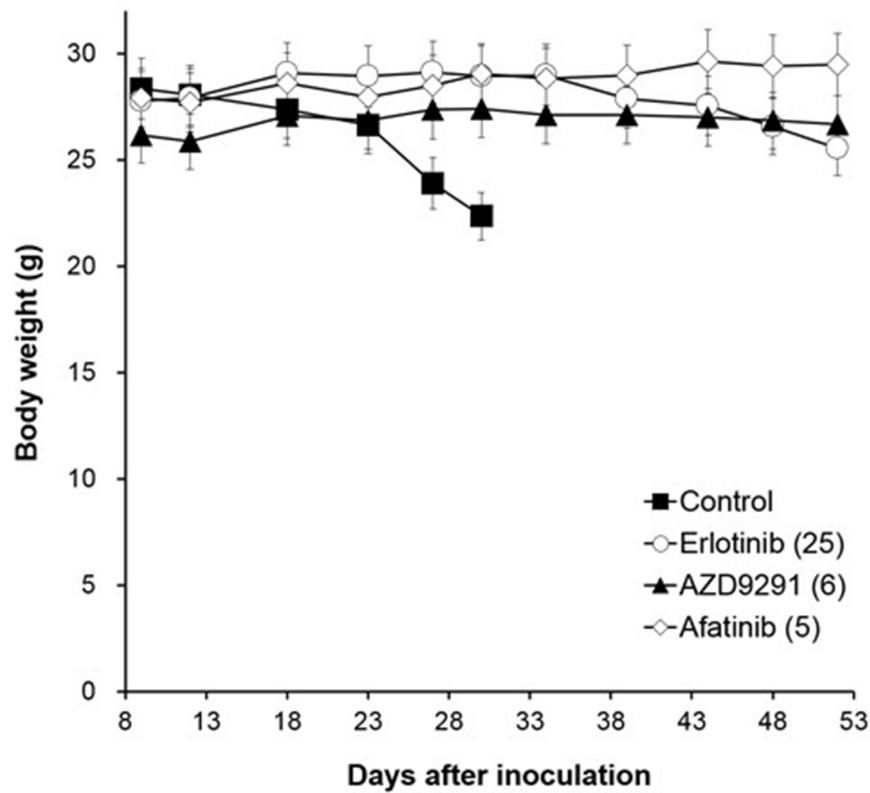

**Supplementary Figure S2: Change in body weight of mice during EGFR-TKI treatment in the LMC model with PC-9/ffluc cells.** LMC mice with PC9/ffluc were administered erlotinib (25 mg/kg), afatinib (5 mg/kg), or AZD9291 (6 mg/kg) once daily for 44 days as in Figure 3B and Figure 5B, and their body weights were measured every 5 days.

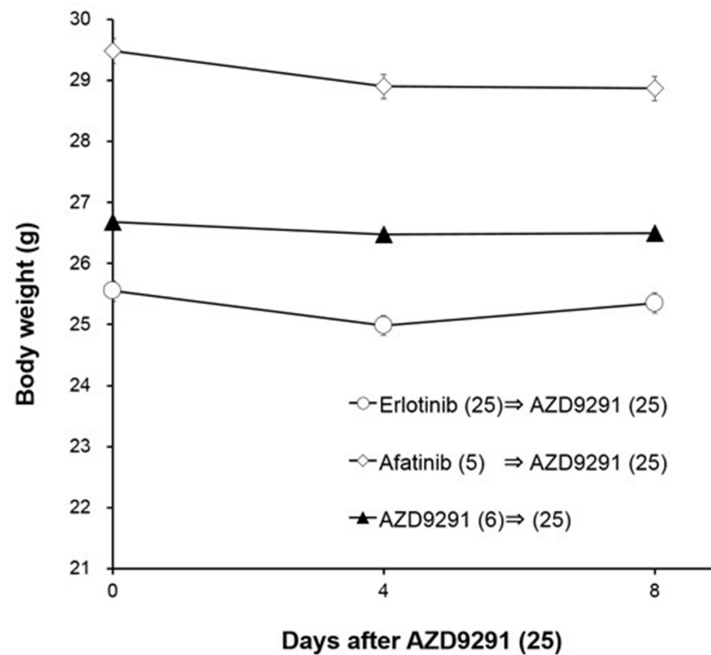

**Supplementary Figure S3: Change in body weight of mice during 25 mg/kg AZD9291 treatment in the LMC model with PC-9/ffluc cells.** The LMC mice with PC9/ffluc were switched to AZD9291 (25 mg/kg) treatment once daily for 8 days after acquiring resistance to erlotinib (25 mg/kg), afatinib (5mg/kg), or AZD9291 (6 mg/kg). Their body weights were measured every 4 days.

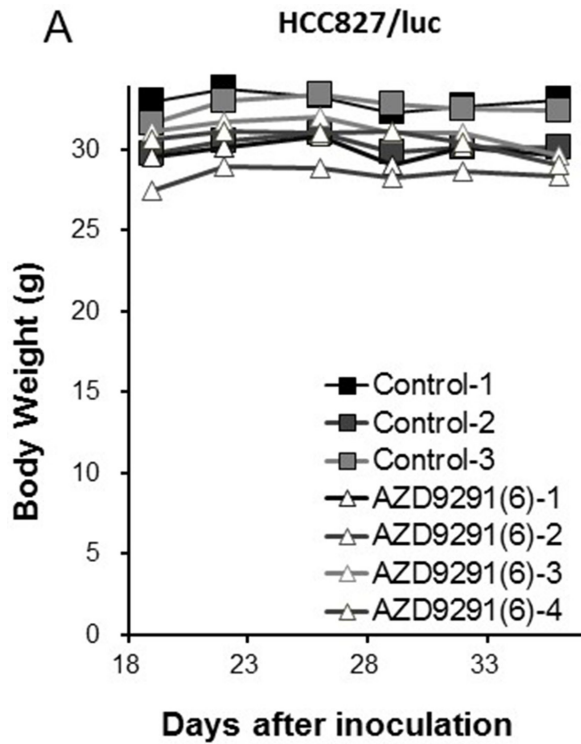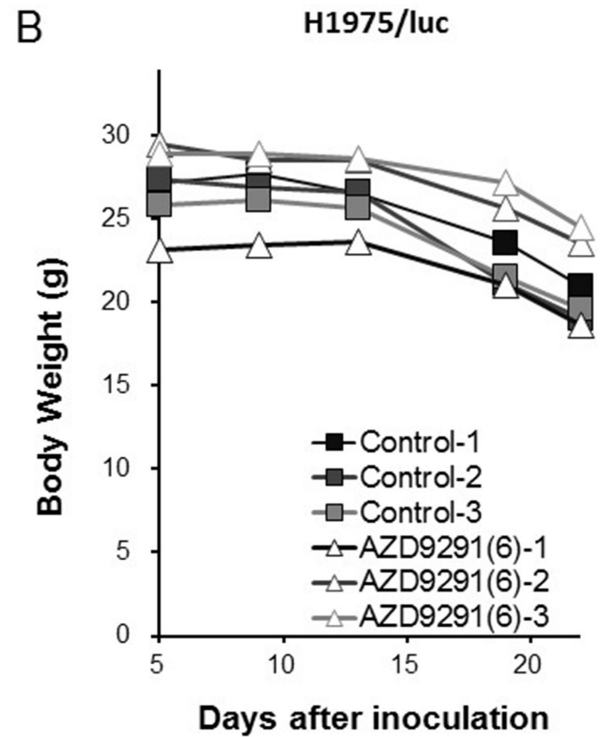

**Supplementary Figure S4: Body weight of LMC mice during AZD9291 treatment.** Body weight of LMC mice with HCC827/luc (A) and H1975/luc (B) were measured during AZD9291 (6 mg/kg) treatment.

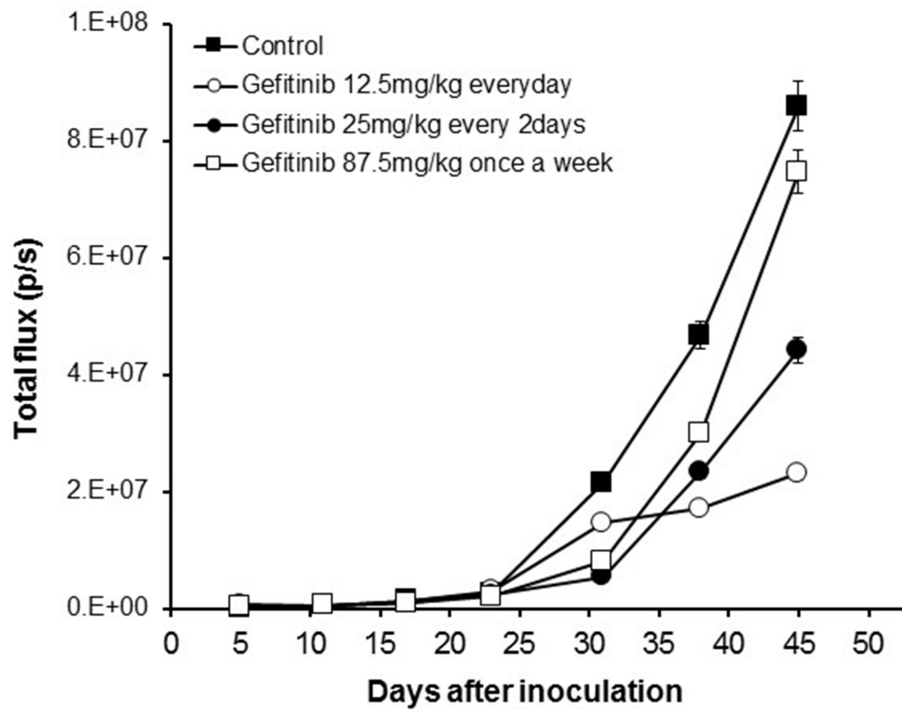

**Supplementary Figure S5: Invalidity of pulsate high dose gefitinib therapies in LMC model with pC-9/ffluc cells.** LMC mice with PC9/ffluc cells were administered gefitinib (12.5 mg/kg daily, 25 mg/kg every 2 days or 87.5 mg/kg once a week) for 6 weeks. Luminescence was evaluated as total flux (p/s: photons/second) and body weights were measured for groups of 4 mice every 5 days.
